# Supplementary material for: 3D-printable zwitterionic nano-composite hydrogel system for biomedical applications
Source: PubMed Central journal article supplement (PMC7604982; doi:10.1177/2041731420967294), 2020-10-29
Supplement: supplementary_data.pdf [file supplementary_data.pdf]

## Supporting information

**Supplementary Table 1:** Tensile data for printed samples with different pre-gel aging times. Values are reported as mean  $\pm$  standard deviation (SD). This data demonstrates that there is no significant difference between tensile properties of samples aged for 5-9 h and 48 h which indicates that aging times of 24h and 48 h should be comparable.

| AGING TIME | STRESS AT BREAK (kPa) | ELONGATION AT BREAK (%) | YOUNGS MODULUS (kPa) |
|------------|-----------------------|-------------------------|----------------------|
| 5-9 h      | 15.0 $\pm$ 1.1        | 119.8 $\pm$ 19.3        | 0.489 $\pm$ 0.180    |
| 48 h       | 16.7 $\pm$ 2.1        | 91.9 $\pm$ 15.0         | 0.657 $\pm$ 0.172    |

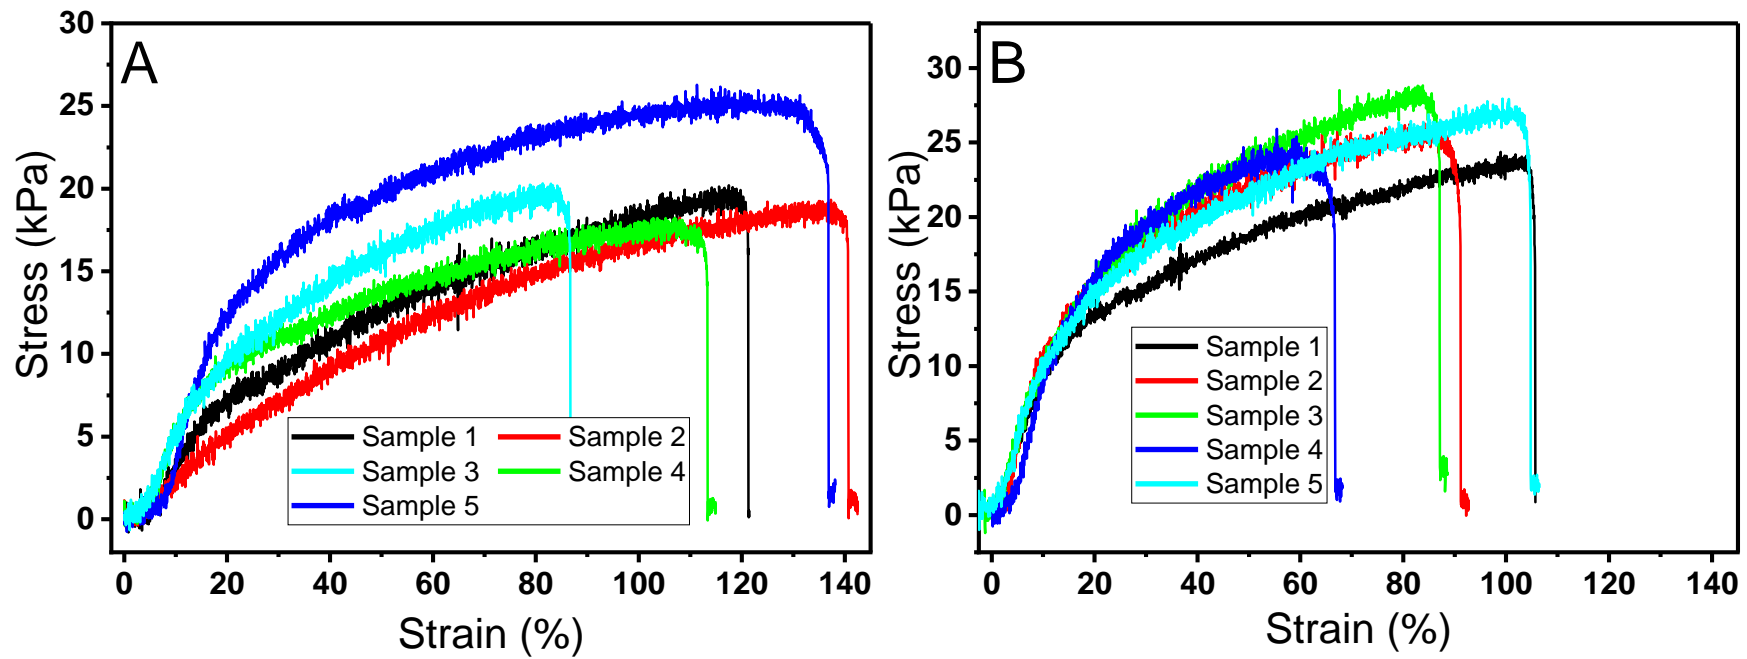

**Supplementary Figure 1:** Tensile stress and strain graphs for differently aged printed samples. A – Sample 1 was aged for 5 h before printing and curing and each consecutive sample was aged for one additional h meaning that sample 5 was aged for 9 h. B – all samples were aged for 48 h before printing and curing.
